# Supplementary material for: Sunflower oil supplementation affects the expression of miR-20a-5p and miR-142-5p in the lactating bovine mammary gland
Source: PubMed Central journal article supplement (PMC5744907; doi:10.1371/journal.pone.0185511), 2017-12-27
Supplement: pone.0185511.s001.pdf [file pone.0185511.s001.pdf]

**Supplementary table 1**

| miRNA              | Total read counts | Normalized read counts |                 | FC (LF-SO/LF) | padj         | Precurseur            |
|--------------------|-------------------|------------------------|-----------------|---------------|--------------|-----------------------|
|                    |                   | LF                     | LF-SO           |               |              |                       |
| miR-148a-3p        | 2792022           | 671837,3               | 710421,9        | 1,06          | 0,997        | bta-mir-148a          |
| let-7a-5p          | 2593370           | 608021,7               | 667701,3        | 1,10          | 0,997        | bta-let-7a-1          |
| miR-26a-5p         | 2462913           | 629487,3               | 576580,8        | 0,92          | 0,997        | bta-mir-26a-2         |
| miR-143-3p         | 2090576           | 503268,8               | 532499,4        | 1,06          | 0,997        | bta-mir-143           |
| miR-21-5p          | 1885942           | 474317,2               | 445517,1        | 0,94          | 0,997        | bta-mir-21            |
| let-7b-5p          | 1616561           | 340061,8               | 463197,4        | 1,36          | 0,997        | bta-let-7b            |
| <b>miR-126-3p</b>  | <b>1215853</b>    | <b>311939,5</b>        | <b>285676,5</b> | <b>0,92</b>   | <b>0,997</b> | <b>bta-mir-126</b>    |
| miR-23a-3p         | 1170162           | 267141,6               | 311237,5        | 1,17          | 0,997        | bta-mir-23a           |
| miR-200c-3p        | 964855            | 247592,2               | 223567,7        | 0,90          | 0,997        | bta-mir-200c          |
| miR-16a-5p         | 925611            | 236882,2               | 216616,8        | 0,91          | 0,997        | bta-mir-16a           |
| miR-22-3p          | 897291            | 205064,7               | 240454,9        | 1,17          | 0,997        | bta-mir-22            |
| miR-126-5p         | 872952            | 221832,0               | 205280,5        | 0,93          | 0,997        | bta-mir-126           |
| miR-24-3p          | 792526            | 182295,5               | 210364,3        | 1,15          | 0,997        | bta-mir-24-1          |
| let-7f-5p          | 761670            | 187731,9               | 185488,2        | 0,99          | 0,997        | bta-let-7f-2          |
| miR-26b-5p         | 760794            | 201567,9               | 169182,5        | 0,84          | 0,997        | bta-mir-26b           |
| let-7g-5p          | 750380            | 191008,5               | 176968,9        | 0,93          | 0,997        | bta-let-7g            |
| miR-141-3p         | 740441            | 179397,0               | 188578,6        | 1,05          | 0,997        | bta-mir-141           |
| miR-99a-5p         | 660641            | 165497,1               | 158906,1        | 0,96          | 0,997        | bta-mir-99a           |
| miR-23b-3p         | 648787            | 153672,4               | 165987,6        | 1,08          | 0,997        | bta-mir-23b           |
| miR-27b-3p         | 619832            | 150556,5               | 155331,6        | 1,03          | 0,997        | bta-mir-27b           |
| miR-29a-3p         | 517209            | 131108,7               | 122991,6        | 0,94          | 0,997        | bta-mir-29a           |
| miR-30a-5p         | 514770            | 129415,7               | 124626,8        | 0,96          | 0,997        | bta-mir-30a           |
| miR-200a-3p        | 487615            | 122067,0               | 118996,0        | 0,97          | 0,997        | bta-mir-200a          |
| miR-200b-3p        | 433720            | 114533,9               | 96462,1         | 0,84          | 0,997        | bta-mir-200b          |
| let-7i-5p          | 413940            | 98212,6                | 106434,7        | 1,08          | 0,997        | bta-let-7i            |
| miR-103-3p         | 409938            | 97903,4                | 105648,9        | 1,08          | 0,997        | bta-mir-103-1         |
| let-7c-5p          | 400713            | 87386,6                | 110745,3        | 1,27          | 0,997        | bta-let-7c            |
| <b>miR-20a-5p</b>  | <b>398590</b>     | <b>102734,8</b>        | <b>93032,6</b>  | <b>0,91</b>   | <b>0,997</b> | <b>bta-mir-20a</b>    |
| miR-92a-3p         | 313042            | 76760,8                | 77078,6         | 1,00          | 0,997        | bta-mir-92a-1         |
| miR-199a-3p        | 309602            | 72176,6                | 80617,0         | 1,12          | 0,997        | bta-mir-199a-2        |
| miR-27a-3p         | 274862            | 65143,9                | 70873,7         | 1,09          | 0,997        | bta-mir-27a           |
| miR-186-5p         | 266167            | 66110,5                | 65315,0         | 0,99          | 0,997        | bta-mir-186           |
| miR-151-5p         | 251396            | 62782,9                | 60962,7         | 0,97          | 0,997        | bta-mir-151           |
| miR-195-5p         | 246902            | 62886,9                | 58167,8         | 0,92          | 0,997        | bta-mir-195           |
| miR-10b-5p         | 244286            | 64552,5                | 54412,5         | 0,84          | 0,997        | bta-mir-10b           |
| miR-29b-3p         | 231074            | 61202,0                | 52222,5         | 0,85          | 0,997        | bta-mir-29b-2         |
| <b>miR-181a-5p</b> | <b>229522</b>     | <b>60049,2</b>         | <b>52490,0</b>  | <b>0,87</b>   | <b>0,997</b> | <b>bta-mir-181a-2</b> |
| miR-145-5p         | 225561            | 56449,0                | 54660,2         | 0,97          | 0,997        | bta-mir-145           |
| <b>miR-15a-5p</b>  | <b>216422</b>     | <b>56841,0</b>         | <b>49293,3</b>  | <b>0,87</b>   | <b>0,997</b> | <b>bta-mir-15a</b>    |
| miR-16b-5p         | 205457            | 53672,2                | 46804,1         | 0,87          | 0,997        | bta-mir-16b           |
| miR-497-5p         | 187051            | 48192,4                | 43932,4         | 0,91          | 0,997        | bta-mir-497           |
| miR-25-3p          | 180555            | 45972,7                | 42341,6         | 0,92          | 0,997        | bta-mir-25            |
| miR-125a-5p        | 180142            | 44514,1                | 43853,7         | 0,99          | 0,997        | bta-mir-125a          |
| <b>miR-17-5p</b>   | <b>179315</b>     | <b>47025,5</b>         | <b>40988,1</b>  | <b>0,87</b>   | <b>0,997</b> | <b>bta-mir-17</b>     |
| miR-125b-5p        | 176697            | 43104,9                | 43768,1         | 1,02          | 0,997        | bta-mir-125b-1        |
| miR-191-5p         | 158002            | 43900,2                | 33071,4         | 0,75          | 0,997        | bta-mir-191           |
| miR-205-5p         | 155666            | 38564,2                | 37950,0         | 0,98          | 0,997        | bta-mir-205           |
| miR-30d-5p         | 150555            | 36726,0                | 37507,1         | 1,02          | 0,997        | bta-mir-30d           |
| miR-320a-3p        | 134181            | 31394,8                | 35246,4         | 1,12          | 0,997        | bta-mir-320a-2        |

|                          |              |               |               |             |              |                    |
|--------------------------|--------------|---------------|---------------|-------------|--------------|--------------------|
| miR-106b-5p              | 131501       | 34703,5       | 29821,7       | 0,86        | 0,997        | bta-mir-106b       |
| miR-139-5p               | 112597       | 27075,4       | 28606,3       | 1,06        | 0,997        | bta-mir-139        |
| let-7d-5p                | 112435       | 28714,6       | 26325,0       | 0,92        | 0,997        | bta-let-7d         |
| miR-34a-5p               | 87848        | 23166,7       | 19964,4       | 0,86        | 0,997        | bta-mir-34a        |
| miR-29c-3p               | 86060        | 21720,9       | 20762,0       | 0,96        | 0,997        | bta-mir-29c        |
| miR-199b-5p              | 82196        | 20644,4       | 19808,1       | 0,96        | 0,997        | bta-mir-199b       |
| miR-93-5p                | 81888        | 19792,0       | 20649,8       | 1,04        | 0,997        | bta-mir-93         |
| miR-145-3p               | 79505        | 20264,7       | 18736,5       | 0,92        | 0,997        | bta-mir-145        |
| miR-375-3p               | 73826        | 17923,0       | 18444,3       | 1,03        | 0,997        | bta-mir-375        |
| miR-152-3p               | 73315        | 17281,0       | 19027,8       | 1,10        | 0,997        | bta-mir-152        |
| miR-2284x-5p             | 72481        | 17775,3       | 17961,2       | 1,01        | 0,997        | bta-mir-2284x      |
| miR-30e-5p               | 70846        | 18207,6       | 16687,3       | 0,92        | 0,997        | bta-mir-30e        |
| miR-652-3p               | 70000        | 16943,4       | 17629,0       | 1,04        | 0,997        | bta-mir-652        |
| miR-151-3p               | 63697        | 15901,7       | 15324,5       | 0,96        | 0,997        | bta-mir-151        |
| miR-423-5p               | 60894        | 14171,4       | 16024,8       | 1,13        | 0,997        | bta-mir-423        |
| miR-30a-3p               | 60834        | 15732,3       | 14062,1       | 0,89        | 0,997        | bta-mir-30a        |
| miR-150-5p               | 59679        | 15254,5       | 13793,1       | 0,90        | 0,997        | bta-mir-150        |
| miR-1468-5p              | 59190        | 15499,4       | 13355,4       | 0,86        | 0,997        | bta-mir-1468       |
| miR-28-5p                | 57320        | 14271,7       | 13946,6       | 0,98        | 0,997        | bta-mir-28         |
| miR-424-5p               | 56261        | 13588,7       | 14178,5       | 1,04        | 0,997        | bta-mir-424        |
| miR-221-3p               | 53760        | 13539,5       | 12937,6       | 0,96        | 0,997        | bta-mir-221        |
| miR-100-5p               | 53307        | 13106,6       | 13090,6       | 1,00        | 0,997        | bta-mir-100        |
| miR-374b-5p              | 51959        | 12844,9       | 12524,3       | 0,98        | 0,997        | bta-mir-374b       |
| miR-181b-5p              | 43977        | 11067,3       | 10592,5       | 0,96        | 0,997        | bta-mir-181b-2     |
| miR-15b-5p               | 42099        | 11345,8       | 9116,5        | 0,80        | 0,997        | bta-mir-15b        |
| miR-193a-5p              | 39436        | 8716,9        | 10992,8       | 1,26        | 0,997        | bta-mir-193a       |
| miR-148b-3p              | 38939        | 9852,5        | 9323,1        | 0,95        | 0,997        | bta-mir-148b       |
| miR-98-5p                | 36580        | 9145,3        | 8786,8        | 0,96        | 0,997        | bta-mir-98         |
| miR-451-5p               | 35102        | 10280,6       | 6795,7        | 0,66        | 0,997        | bta-mir-451        |
| <i>bta-10_2736_mt-3p</i> | <i>33591</i> | <i>7059,9</i> | <i>9697,1</i> | <i>1,37</i> | <i>0,996</i> | <i>bta-10_2736</i> |
| miR-199c-3p              | 33045        | 7742,7        | 8548,7        | 1,10        | 0,997        | bta-mir-199c       |
| miR-146a-5p              | 32712        | 8191,1        | 7886,4        | 0,96        | 0,997        | bta-mir-146a       |
| miR-185-5p               | 32352        | 7567,9        | 8488,1        | 1,12        | 0,997        | bta-mir-185        |
| miR-429-3p               | 31621        | 7853,5        | 7690,9        | 0,98        | 0,997        | bta-mir-429        |
| miR-338-3p               | 31308        | 7792,2        | 7703,5        | 0,99        | 0,997        | bta-mir-338        |
| miR-30e-3p               | 30958        | 7963,1        | 7195,0        | 0,90        | 0,997        | bta-mir-30e        |
| miR-22-5p                | 30132        | 7135,5        | 7792,0        | 1,09        | 0,997        | bta-mir-22         |
| miR-340-5p               | 29168        | 6986,5        | 7478,6        | 1,07        | 0,997        | bta-mir-340        |
| miR-31-5p                | 28311        | 6200,6        | 7914,0        | 1,28        | 0,997        | bta-mir-31         |
| miR-130a-3p              | 27314        | 7270,5        | 6128,7        | 0,84        | 0,997        | bta-mir-130a       |
| <i>bta-5_32567_mt-5p</i> | <i>26612</i> | <i>6754,5</i> | <i>6316,6</i> | <i>0,94</i> | <i>0,996</i> | <i>bta-5_32567</i> |
| miR-362-5p               | 26155        | 6586,1        | 6338,6        | 0,96        | 0,997        | bta-mir-362        |
| miR-361-5p               | 25893        | 6293,6        | 6466,2        | 1,03        | 0,997        | bta-mir-361        |
| miR-194-5p               | 25807        | 6388,4        | 6320,3        | 0,99        | 0,997        | bta-mir-194-1      |
| miR-660-5p               | 25095        | 6229,1        | 6108,7        | 0,98        | 0,997        | bta-mir-660        |
| miR-18a-5p               | 24919        | 6554,9        | 5672,4        | 0,87        | 0,997        | bta-mir-18a        |
| miR-101-3p               | 23742        | 6433,9        | 5187,2        | 0,81        | 0,997        | bta-mir-101-2      |
| miR-1-3p                 | 23544        | 6703,3        | 4671,9        | 0,70        | 0,997        | bta-mir-1-1        |
| miR-342-3p               | 23485        | 5889,0        | 5641,0        | 0,96        | 0,997        | bta-mir-342        |
| miR-140-3p               | 23478        | 6265,9        | 5252,8        | 0,84        | 0,997        | bta-mir-140        |
| miR-411a-5p              | 23402        | 5144,7        | 6480,2        | 1,26        | 0,997        | bta-mir-411a       |
| miR-374a-5p              | 23134        | 5956,9        | 5392,3        | 0,91        | 0,997        | bta-mir-374a       |

|                           |              |               |               |             |              |                      |
|---------------------------|--------------|---------------|---------------|-------------|--------------|----------------------|
| miR-378-5p                | 21149        | 5139,3        | 5336,9        | 1,04        | 0,997        | bta-mir-378-2        |
| <b>miR-142-5p</b>         | <b>20909</b> | <b>5866,4</b> | <b>4291,8</b> | <b>0,73</b> | <b>0,997</b> | <b>bta-mir-142</b>   |
| miR-378-3p                | 20835        | 5069,3        | 5251,0        | 1,04        | 0,997        | bta-mir-378-1        |
| miR-532-5p                | 20351        | 4956,7        | 5100,7        | 1,03        | 0,997        | bta-mir-532          |
| miR-146b-5p               | 19409        | 5656,3        | 3631,6        | 0,64        | 0,997        | bta-mir-146b         |
| miR-450a-5p               | 19230        | 4544,6        | 4951,8        | 1,09        | 0,997        | bta-mir-450a-2       |
| miR-182-5p                | 19141        | 4741,8        | 4685,4        | 0,99        | 0,997        | bta-mir-182          |
| miR-106a-5p               | 18735        | 4933,8        | 4290,3        | 0,87        | 0,997        | bta-mir-106a         |
| miR-214-3p                | 18295        | 4041,7        | 5049,3        | 1,25        | 0,997        | bta-mir-214          |
| miR-10a-5p                | 17718        | 4682,7        | 3937,3        | 0,84        | 0,997        | bta-mir-10a          |
| miR-500-5p                | 17305        | 4183,3        | 4384,3        | 1,05        | 0,997        | bta-mir-500          |
| miR-200b-5p               | 16471        | 4093,0        | 3972,3        | 0,97        | 0,997        | bta-mir-200b         |
| miR-1839-5p               | 12455        | 3251,7        | 2874,6        | 0,88        | 0,997        | bta-mir-1839         |
| miR-99b-5p                | 12409        | 3025,4        | 3077,1        | 1,02        | 0,997        | bta-mir-99b          |
| miR-140-5p                | 11671        | 2891,0        | 2857,1        | 0,99        | 0,997        | bta-mir-140          |
| miR-425-5p                | 11642        | 2903,7        | 2817,9        | 0,97        | 0,997        | bta-mir-425          |
| miR-128-3p                | 11355        | 2823,8        | 2765,1        | 0,98        | 0,997        | bta-mir-128-1        |
| miR-218-5p                | 11044        | 2607,8        | 2828,2        | 1,08        | 0,997        | bta-mir-218-1        |
| miR-224-5p                | 10368        | 2426,8        | 2694,4        | 1,11        | 0,997        | bta-mir-224          |
| miR-199a-5p               | 10060        | 2460,7        | 2506,9        | 1,02        | 0,997        | bta-mir-199a-2       |
| miR-20b-5p                | 10047        | 2669,6        | 2268,1        | 0,85        | 0,997        | bta-mir-20b          |
| miR-142-3p                | 9675         | 2582,4        | 2143,1        | 0,83        | 0,997        | bta-mir-142          |
| miR-3431-5p               | 9039         | 1986,3        | 2525,3        | 1,27        | 0,997        | bta-mir-3431         |
| miR-486-5p                | 8933         | 2184,5        | 2202,1        | 1,01        | 0,997        | bta-mir-486          |
| miR-423-3p                | 8266         | 1907,4        | 2187,3        | 1,15        | 0,997        | bta-mir-423          |
| miR-20a-3p                | 7848         | 1948,5        | 1924,1        | 0,99        | 0,997        | bta-mir-20a          |
| miR-196a-5p               | 7775         | 1863,7        | 1953,1        | 1,05        | 0,997        | bta-mir-196a-2       |
| miR-196b-5p               | 7543         | 1842,7        | 1873,7        | 1,02        | 0,997        | bta-mir-196b         |
| <i>bta-16_10094_mt-5p</i> | 7365         | 1851,5        | 1754,5        | 0,95        | 0,996        | <i>bta-mir-2285t</i> |
| miR-155-5p                | 7164         | 1913,0        | 1567,3        | 0,82        | 0,997        | bta-mir-155          |
| miR-376c-3p               | 7079         | 1755,7        | 1744,8        | 0,99        | 0,997        | bta-mir-376c         |
| miR-379-5p                | 7025         | 1520,8        | 1975,4        | 1,30        | 0,997        | bta-mir-379          |
| miR-2284z-5p              | 6938         | 1871,3        | 1512,9        | 0,81        | 0,997        | bta-mir-2284z-2      |
| <i>bta-16_10667_mt-5p</i> | 6656         | 1469,2        | 1829,0        | 1,24        | 0,996        | <i>bta-5_31862</i>   |
| miR-18b-5p                | 6461         | 1748,9        | 1424,6        | 0,81        | 0,997        | bta-mir-18b          |
| miR-374a-3p               | 6421         | 1729,1        | 1401,4        | 0,81        | 0,997        | bta-mir-374a         |
| miR-455-3p                | 6386         | 1461,8        | 1708,7        | 1,17        | 0,997        | bta-mir-455          |
| miR-369-3p                | 6201         | 1390,7        | 1681,9        | 1,21        | 0,997        | bta-mir-369          |
| miR-106b-3p               | 5967         | 1420,1        | 1535,5        | 1,08        | 0,997        | bta-mir-106b         |
| miR-17-3p                 | 5958         | 1553,6        | 1387,7        | 0,89        | 0,997        | bta-mir-17           |
| miR-135a-5p               | 5642         | 1417,3        | 1363,2        | 0,96        | 0,997        | bta-mir-135a-2       |
| miR-222-3p                | 5615         | 1372,6        | 1395,7        | 1,02        | 0,997        | bta-mir-222          |
| miR-29b-2-5p              | 5452         | 1307,4        | 1394,5        | 1,07        | 0,997        | bta-mir-29b-2        |
| miR-324-5p                | 5356         | 1265,9        | 1388,7        | 1,10        | 0,997        | bta-mir-324          |
| miR-183-5p                | 5296         | 1232,6        | 1375,0        | 1,12        | 0,997        | bta-mir-183          |
| miR-339a-5p               | 5022         | 1256,7        | 1227,8        | 0,98        | 0,997        | bta-mir-339a         |
| miR-494-3p                | 4735         | 1072,5        | 1278,3        | 1,19        | 0,997        | bta-mir-494          |
| miR-380-3p                | 4704         | 995,5         | 1349,3        | 1,36        | 0,997        | bta-mir-380          |
| miR-361-3p                | 4628         | 1192,0        | 1084,1        | 0,91        | 0,997        | bta-mir-361          |
| miR-7-5p                  | 4548         | 1165,3        | 1060,7        | 0,91        | 0,997        | bta-mir-7-2          |
| miR-1388-3p               | 4469         | 1098,7        | 1096,3        | 1,00        | 0,997        | bta-mir-1388         |
| miR-32-5p                 | 4438         | 1166,2        | 1007,1        | 0,86        | 0,997        | bta-mir-32           |

|                           |             |              |              |             |              |                     |
|---------------------------|-------------|--------------|--------------|-------------|--------------|---------------------|
| miR-2284ab-5p             | 4381        | 1109,4       | 1037,6       | 0,94        | 0,997        | bta-mir-2284ab      |
| miR-421-3p                | 4272        | 1106,0       | 983,3        | 0,89        | 0,997        | bta-mir-421         |
| miR-125b-2-3p             | 4231        | 1036,1       | 1050,0       | 1,01        | 0,997        | bta-mir-125b-2      |
| miR-376e-3p               | 4191        | 1098,9       | 959,9        | 0,87        | 0,997        | bta-mir-376e        |
| miR-500a-3p               | 4013        | 974,6        | 1010,5       | 1,04        | 0,997        | bta-mir-500         |
| miR-499-5p                | 3980        | 945,7        | 1022,9       | 1,08        | 0,997        | bta-mir-499         |
| miR-542-3p                | 3862        | 873,9        | 1038,4       | 1,19        | 0,997        | bta-mir-542         |
| miR-30b-5p                | 3860        | 963,9        | 938,6        | 0,97        | 0,997        | bta-mir-30b         |
| miR-301a-3p               | 3827        | 995,5        | 889,0        | 0,89        | 0,997        | bta-mir-301a        |
| miR-29a-5p                | 3730        | 976,3        | 848,0        | 0,87        | 0,997        | bta-mir-29a         |
| miR-30c-2-3p              | 3655        | 899,2        | 905,8        | 1,01        | 0,997        | bta-mir-30f         |
| miR-96-5p                 | 3554        | 836,6        | 926,5        | 1,11        | 0,997        | bta-mir-96          |
| miR-136-3p                | 3374        | 758,9        | 924,3        | 1,22        | 0,997        | bta-mir-136         |
| miR-339b-5p               | 3294        | 815,5        | 817,4        | 1,00        | 0,997        | bta-mir-339b        |
| <b>miR-223-3p</b>         | <b>3209</b> | <b>869,7</b> | <b>697,7</b> | <b>0,80</b> | <b>0,997</b> | <b>bta-mir-223</b>  |
| miR-6524-3p               | 2769        | 706,9        | 650,1        | 0,92        | 0,997        | bta-mir-6524        |
| miR-409-3p                | 2734        | 512,7        | 859,2        | 1,68        | 0,997        | bta-mir-409a        |
| miR-363-3p                | 2704        | 671,0        | 668,8        | 1,00        | 0,997        | bta-mir-363         |
| miR-487b-3p               | 2688        | 590,2        | 746,4        | 1,26        | 0,997        | bta-mir-487b        |
| miR-378c-5p               | 2499        | 678,2        | 544,9        | 0,80        | 0,997        | bta-mir-378c        |
| miR-340-3p                | 2444        | 647,6        | 547,0        | 0,84        | 0,997        | bta-mir-340         |
| miR-200a-5p               | 2423        | 584,1        | 613,7        | 1,05        | 0,997        | bta-mir-200a        |
| miR-493-5p                | 2357        | 497,4        | 670,3        | 1,35        | 0,997        | bta-mir-493         |
| miR-92b-3p                | 2348        | 597,8        | 550,9        | 0,92        | 0,997        | bta-mir-92b         |
| miR-2284aa-5p             | 2245        | 596,9        | 499,1        | 0,84        | 0,997        | bta-mir-2284aa-3    |
| miR-2419-5p               | 2227        | 577,9        | 510,6        | 0,88        | 0,997        | bta-mir-2419        |
| <i>bta-26_24925_mt-3p</i> | <i>2196</i> | <i>502,3</i> | <i>580,0</i> | <i>1,15</i> | <i>0,996</i> | <i>bta-26_24925</i> |
| miR-376b-3p               | 2177        | 621,8        | 444,5        | 0,71        | 0,997        | bta-mir-376b        |
| miR-331-5p                | 2090        | 513,5        | 518,2        | 1,01        | 0,997        | bta-mir-331         |
| miR-484-5p                | 2060        | 495,8        | 524,1        | 1,06        | 0,997        | bta-mir-484         |
| miR-19b-3p                | 2032        | 530,8        | 467,1        | 0,88        | 0,997        | bta-mir-19b-2       |
| <i>bta-7_35384_mt-5p</i>  | <i>2017</i> | <i>509,5</i> | <i>474,5</i> | <i>0,93</i> | <i>0,996</i> | <i>bta-7_35384</i>  |
| miR-708-5p                | 2005        | 464,7        | 528,2        | 1,14        | 0,997        | bta-mir-708         |
| miR-2284y-5p              | 1936        | 469,4        | 486,0        | 1,04        | 0,997        | bta-mir-2284y-5     |
| <i>bta-25_23442_mt-3p</i> | <i>1868</i> | <i>434,3</i> | <i>484,5</i> | <i>1,12</i> | <i>0,996</i> | <i>bta-25_23442</i> |
| miR-382-5p                | 1821        | 368,1        | 543,3        | 1,48        | 0,997        | bta-mir-382         |
| miR-30c-5p                | 1811        | 459,1        | 431,1        | 0,94        | 0,997        | bta-mir-30c         |
| <i>bta-13_7394_mt-3p</i>  | <i>1800</i> | <i>435,8</i> | <i>446,0</i> | <i>1,02</i> | <i>0,996</i> | <i>bta-13_7394</i>  |
| miR-1343-3p               | 1794        | 404,9        | 488,1        | 1,21        | 0,997        | bta-mir-1343        |
| miR-381-3p                | 1790        | 381,9        | 512,8        | 1,34        | 0,997        | bta-mir-381         |
| <i>bta-22_21141_mt-5p</i> | <i>1780</i> | <i>495,3</i> | <i>367,2</i> | <i>0,74</i> | <i>0,996</i> | <i>bta-22_21141</i> |
| miR-10b-3p                | 1776        | 429,1        | 447,3        | 1,04        | 0,997        | bta-mir-10b         |
| miR-127-3p                | 1772        | 397,1        | 486,8        | 1,23        | 0,997        | bta-mir-127         |
| miR-95-3p                 | 1772        | 426,6        | 446,9        | 1,05        | 0,997        | bta-mir-95          |
| miR-543-3p                | 1765        | 335,6        | 550,4        | 1,64        | 0,997        | bta-mir-543         |
| miR-299-5p                | 1763        | 396,9        | 480,9        | 1,21        | 0,997        | bta-mir-299         |
| <i>bta-29_26806_mt-5p</i> | <i>1758</i> | <i>350,2</i> | <i>525,6</i> | <i>1,50</i> | <i>0,996</i> | <i>bta-29_26806</i> |
| miR-664b-3p               | 1751        | 451,1        | 404,6        | 0,90        | 0,997        | bta-mir-664b        |
| miR-30b-3p                | 1713        | 409,7        | 433,7        | 1,06        | 0,997        | bta-mir-30b         |
| miR-365-3p                | 1705        | 413,6        | 429,0        | 1,04        | 0,997        | bta-mir-365-1       |
| miR-149-5p                | 1704        | 379,4        | 469,8        | 1,24        | 0,997        | bta-mir-149         |
| miR-29c-5p                | 1653        | 421,8        | 395,1        | 0,94        | 0,997        | bta-mir-29c         |

|                           |             |              |              |             |              |                     |
|---------------------------|-------------|--------------|--------------|-------------|--------------|---------------------|
| miR-29d-5p                | 1648        | 421,3        | 392,9        | 0,93        | 0,997        | bta-mir-29d         |
| miR-452-5p                | 1598        | 346,6        | 451,4        | 1,30        | 0,997        | bta-mir-452         |
| miR-181c-5p               | 1598        | 444,7        | 334,3        | 0,75        | 0,997        | bta-mir-181c        |
| let-7a-3p                 | 1589        | 408,5        | 372,2        | 0,91        | 0,997        | bta-let-7a-1        |
| miR-411c-5p               | 1577        | 387,1        | 389,0        | 1,01        | 0,997        | bta-mir-411c        |
| miR-6119-5p               | 1546        | 428,2        | 328,2        | 0,77        | 0,997        | bta-mir-6119        |
| miR-378a-5p               | 1507        | 360,8        | 387,2        | 1,07        | 0,997        | bta-mir-378-1       |
| miR-192-5p                | 1474        | 369,2        | 354,7        | 0,96        | 0,997        | bta-mir-192         |
| miR-24-5p                 | 1442        | 370,3        | 337,8        | 0,91        | 0,997        | bta-mir-24-1        |
| miR-1306-5p               | 1389        | 321,8        | 363,0        | 1,13        | 0,997        | bta-mir-1306        |
| miR-6120-3p               | 1365        | 330,7        | 344,6        | 1,04        | 0,997        | bta-mir-6120        |
| <i>bta-6_33860_mt-3p</i>  | <i>1325</i> | <i>353,7</i> | <i>292,6</i> | <i>0,83</i> | <i>0,996</i> | <i>bta-X_40652</i>  |
| miR-181a-3p               | 1302        | 360,6        | 271,7        | 0,75        | 0,997        | bta-mir-181a-1      |
| <i>bta-26_24925_st-5p</i> | <i>1300</i> | <i>270,6</i> | <i>375,6</i> | <i>1,39</i> | <i>0,996</i> | <i>bta-26_24925</i> |
| miR-191-3p                | 1279        | 307,3        | 324,0        | 1,05        | 0,997        | bta-mir-191         |
| miR-454-3p                | 1253        | 324,7        | 287,6        | 0,89        | 0,997        | bta-mir-454         |
| miR-7859-3p               | 1235        | 337,1        | 266,0        | 0,79        | 0,997        | bta-mir-7859        |
| miR-424-3p                | 1226        | 251,8        | 360,3        | 1,43        | 0,997        | bta-mir-424         |
| miR-221-5p                | 1205        | 311,0        | 278,0        | 0,89        | 0,997        | bta-mir-221         |
| miR-125a-3p               | 1199        | 265,3        | 331,8        | 1,25        | 0,997        | bta-mir-125a        |
| miR-455-5p                | 1174        | 268,6        | 314,2        | 1,17        | 0,997        | bta-mir-455         |
| miR-744-5p                | 1157        | 295,7        | 276,1        | 0,93        | 0,997        | bta-mir-744         |
| miR-450b-5p               | 1140        | 308,5        | 245,4        | 0,80        | 0,997        | bta-mir-450b        |
| miR-29b-1-5p              | 1124        | 298,3        | 249,7        | 0,84        | 0,997        | bta-mir-29b-1       |
| <i>bta-26_25392_mt-3p</i> | <i>1108</i> | <i>270,1</i> | <i>275,2</i> | <i>1,02</i> | <i>0,996</i> | <i>bta-26_25392</i> |
| <i>bta-14_8643_mt-5p</i>  | <i>1080</i> | <i>303,1</i> | <i>218,3</i> | <i>0,72</i> | <i>0,996</i> | <i>bta-14_8643</i>  |
| miR-181d-5p               | 1060        | 267,5        | 252,5        | 0,94        | 0,997        | bta-mir-181d        |
| miR-2285t-3p              | 1055        | 270,6        | 246,2        | 0,91        | 0,997        | bta-mir-2285t       |
| miR-874-3p                | 1036        | 254,1        | 257,5        | 1,01        | 0,997        | bta-mir-874         |
| miR-671-5p                | 1032        | 227,7        | 287,3        | 1,26        | 0,997        | bta-mir-671         |
| miR-6529-5p               | 993         | 220,3        | 271,2        | 1,23        | 0,997        | bta-mir-6529        |
| miR-195a-3p               | 924         | 225,3        | 230,4        | 1,02        | 0,997        | bta-mir-195         |
| miR-299a-3p               | 904         | 222,0        | 226,0        | 1,02        | 0,997        | bta-mir-299         |
| <i>bta-8_37539_mt-5p</i>  | <i>894</i>  | <i>221,6</i> | <i>216,4</i> | <i>0,98</i> | <i>0,996</i> | <i>bta-8_37539</i>  |
| miR-7-1-3p                | 884         | 246,4        | 182,6        | 0,74        | 0,997        | bta-mir-7-2         |
| miR-130b-3p               | 877         | 244,3        | 185,0        | 0,76        | 0,997        | bta-mir-130b        |
| <i>bta-26_25421_mt-5p</i> | <i>855</i>  | <i>194,6</i> | <i>231,1</i> | <i>1,19</i> | <i>0,996</i> | <i>bta-26_25421</i> |
| miR-502a-3p               | 846         | 230,5        | 184,1        | 0,80        | 0,997        | bta-mir-502a-1      |
| miR-503-5p                | 835         | 173,4        | 245,2        | 1,41        | 0,997        | bta-mir-503         |
| miR-411-3p                | 835         | 190,0        | 224,1        | 1,18        | 0,997        | bta-mir-411a        |
| miR-32-3p                 | 828         | 209,4        | 198,6        | 0,95        | 0,997        | bta-mir-32          |
| miR-30c-1-3p              | 827         | 192,2        | 217,5        | 1,13        | 0,997        | bta-mir-30c         |
| miR-27b-5p                | 826         | 197,3        | 211,4        | 1,07        | 0,997        | bta-mir-27b         |
| miR-665-3p                | 825         | 161,3        | 254,2        | 1,58        | 0,997        | bta-mir-665         |
| miR-2284n-5p              | 792         | 199,8        | 190,6        | 0,95        | 0,997        | bta-mir-2284n       |
| miR-127-5p                | 786         | 171,1        | 223,9        | 1,31        | 0,997        | bta-mir-127         |
| miR-335-5p                | 782         | 183,9        | 203,2        | 1,10        | 0,997        | bta-mir-335         |
| miR-147-3p                | 764         | 181,4        | 194,3        | 1,07        | 0,997        | bta-mir-147         |
| miR-139-3p                | 763         | 142,4        | 240,5        | 1,69        | 0,997        | bta-mir-139         |
| <i>bta-29_27558_mt-5p</i> | <i>726</i>  | <i>144,9</i> | <i>216,5</i> | <i>1,49</i> | <i>0,996</i> | <i>bta-29_27558</i> |
| miR-2299-3p               | 685         | 163,8        | 176,3        | 1,08        | 0,997        | bta-mir-2299        |
| miR-532-3p                | 680         | 174,3        | 159,1        | 0,91        | 0,997        | bta-mir-532         |

|                           |     |              |              |             |              |                        |
|---------------------------|-----|--------------|--------------|-------------|--------------|------------------------|
| miR-379-3p                | 678 | 147,4        | 189,9        | 1,29        | 0,997        | bta-mir-379            |
| miR-9-5p                  | 609 | 175,1        | 118,7        | 0,68        | 0,997        | bta-mir-9-2            |
| <i>bta-24_23039_mt-5p</i> | 562 | <i>120,2</i> | <i>158,8</i> | <i>1,32</i> | <i>0,996</i> | <i>bta-mir-2285e-2</i> |
| miR-491-5p                | 558 | 126,6        | 152,4        | 1,20        | 0,997        | bta-mir-491            |
| miR-215-5p                | 421 | 133,7        | 65,8         | 0,49        | 0,997        | bta-mir-215            |

*Predicted miRNA are in italic*

In **bold** miRNA used for Rt-qPCR
